1  
2  
3  
4  
5  
6  
7  
8  
9  
10  
11  
12  
13  
14  
15  
16  
17  
18  
19  
20

**Detailed analyses of stall force generation in *Mycoplasma mobile* gliding**

**Masaki Mizutani<sup>a</sup>, Isil Tulum<sup>a,b</sup>, Yoshiaki Kinoshita<sup>c</sup>, Takayuki Nishizaka<sup>c</sup> and  
Makoto Miyata<sup>a,b</sup>**

<sup>a</sup> Graduate School of Science, Osaka City University, 3-3-138 Sugimoto, Sumiyoshi-ku,  
Osaka 558-8585, Japan

<sup>b</sup> The OCU Advanced Research Institute for Natural Science and Technology  
(OCARINA), Osaka City University, 3-3-138 Sugimoto, Sumiyoshi-ku, Osaka  
558-8585, Japan

<sup>c</sup> Department of Physics, Faculty of Science, Gakushuin University, 1-5-1 Mejiro,  
Toshima-ku, Tokyo 171-8588, Japan

Corresponding author: (Makoto Miyata, Graduate School of Science, Osaka City  
University, 3-3-138 Sugimoto, Sumiyoshi-ku, Osaka 558-8585, Japan,  
+81-6-6605-3157, [miyata@sci.osaka-cu.ac.jp](mailto:miyata@sci.osaka-cu.ac.jp))

Key words: gliding motility, optical tweezers, force measurement, gear ratio, energy  
conversion

21

## 22 **Abstract**

23 *Mycoplasma mobile* glides on solid surfaces at a velocity of up to 4.5  $\mu\text{m/s}$  with a  
 24 unique mechanism. The gliding machinery composed of hundreds of units generates  
 25 the force for gliding based on the energy of ATP, and catches and pulls the sialylated  
 26 oligosaccharides fixed on solid surfaces. In the present study, we measured the stall  
 27 force of a wild type and mutant strains of *M. mobile* carrying a bead manipulated by  
 28 using optical tweezers. The strains enhanced for binding showed weaker stall force  
 29 than the wild-type strain, indicating that the stall force is related to the step of force  
 30 generation rather than binding. The stall force of the wild-type strain decreased  
 31 linearly from 113 to 19 pN by the addition of free sialyllactose, a sialylated  
 32 oligosaccharide from 0 to 0.5 mM with decreasing the number of working units. In the  
 33 0.5 mM sialyllactose conditions, the cells carrying a bead loaded by the optical tweezers  
 34 showed stepwise movements with force increments. The force increments distributed  
 35 from 1 to 2 pN. Considering the 70-nm large step size, this small unit force may be  
 36 explained by the large gear ratio involved in the gliding machinery of *M. mobile*.

37

## 38 **Significance**

39 *Mycoplasma* is a group of bacteria parasitic for animals. Dozens of species glide on  
 40 their host tissues for infection. The gliding machinery of *Mycoplasma mobile*, the  
 41 fastest species includes intracellular motors and many legs on the cell surface. In the  
 42 present study, we measured the force generation precisely by using strongly focused  
 43 laser beam, called optical tweezers, in different conditions. The measurements  
 44 suggested that the gliding machinery has a large gear ratio to achieve the fast gliding  
 45 speed.

46

## 47 **Introduction**

48 Class *Mollicutes*, represented by *Mycoplasma* is parasitic and occasionally  
 49 commensal bacteria that have small cell size, genomes, and no peptidoglycan layer (1,  
 50 2). Dozens of *Mycoplasma* species featured by protrusions, such as the fish pathogen  
 51 *Mycoplasma mobile* (3-5) and the human pathogen *Mycoplasma pneumoniae* (6-8)  
 52 exhibit gliding motility in the direction of the protrusion on solid surfaces, which is

involved in the parasitism of mycoplasmas. Interestingly, mycoplasma gliding has no relation with flagella, pili, other bacterial motility systems or conventional motor proteins that are common in eukaryotic motility.

*M. mobile*, isolated from the gills of a freshwater fish, is a fast-gliding mycoplasma (9-13). It glides smoothly and continuously on glass at an average speed of 2.0 to 4.5  $\mu\text{m/s}$ , or three to seven times the length of the cell per second. The gliding mechanism of *M. mobile* has been studied and proposed a working model, called centipede or power-stroke model, by which the cells repeatedly catch, pull drag and release sialylated oligosaccharides (SOs) on solid surfaces (3-5, 14). The gliding machinery is composed of internal and surface structures (15-19). The internal structure includes the  $\alpha$ - and  $\beta$ -subunit paralogs of F-type ATPase/synthase and generates the force for gliding, based on the energy of ATP (18-22). The force should be transmitted across the cell membrane to the surface structure, which is composed of at least three huge proteins, Gli123, Gli521 and Gli349 (15-17, 23). Gli521, the crank protein transmits the force from the cell inside to Gli349 with actual structural changes (17, 24). Gli349, the leg protein extends after thermal fluctuation and catches SOs which is the major structures on animal cell surfaces (Fig 1A) (9, 25-27). The cells always glide in the direction of the machinery, which may be caused by the directed binding of cells on solid surfaces (3, 28). Hundreds of gliding units existing on the cell should function cooperatively to achieve smooth gliding (Fig. 1B) (15, 27, 29). To examine this working model in detail, the behaviors of individual units should be clarified.

Recently, the discrete movements of gliding motility, possibly single leg movement was observed by controlling the working leg number through addition of free SOs (22, 27). Now, we focus on the pulling force exerted to the solid surface in the movements, because the force generation was not analyzed carefully for other than the final stall force of the wild-type strain (ref). In the present study, we quantitatively measured the force of whole cell of various strains under various conditions by using optical tweezers (11, 28, 30-32), and characterized the force generated by the gliding machinery.

81

## 82 Results

83 **Stall force measurement.** To examine the force of *Mycoplasma mobile* gliding, we

84 measured a stall force by optical tweezers. Previously, the propelling force of *M.*  
85 *mobile* cell was measured by using optical tweezers (11). The bead bound to the cell  
86 was trapped by strongly focused laser beam and the force was calculated from the  
87 distance between the centers of bead and trap because the force acting on the bead  
88 increases linearly with the displacement from the trap center (11, 28, 32). In the  
89 present study, *M. mobile* cells, biotinylated and suspended in phosphate-buffer saline  
90 with glucose (PBS/G) were inserted into a tunnel chamber. Then, we added  
91 1- $\mu$ m-diameter polystyrene beads coated with avidin to the tunnel. A bead trapped by  
92 optical tweezers was attached to the back end of the gliding cell through the  
93 avidin-biotin interaction (28, 33, 34). The cell pulled the bead from the trap center  
94 (Fig. 2A and Movie S1), and the pulling force increased from 0 s and reached the  
95 plateau at around 40 s. The maximum values for average of 25 data points were used  
96 as the stall force. The stall force of wild-type strain was  $113 \pm 32$  pN ( $n = 50$ ).  
97 To determine the proteins involved in force generation or force transmission, we  
98 measured the stall force to compare with that of the wild-type strain, for six strains  
99 which were previously isolated and featured for gliding speed and/or binding activity  
100 (12, 21, 35). The *gli521* (P476R) mutant was reported to have a single amino acid  
101 substitution from proline at 476th to arginine in Gli521 (21), and mutations in the other  
102 strains have not been analyzed. The pulling forces of these mutants also increased  
103 from 0 s and stalled at 20–50 s. The stall force of m14 strain,  $110 \pm 29$  pN ( $n = 29$ )  
104 was not significantly different from that of the wild-type strain ( $P = 0.1 > 0.05$  by  
105 Student's *t*-test). The stall forces of the *gli521* (P476R), m6, m27, m29 and m34  
106 mutants were significantly reduced to 64%–81% of that of the wild-type strain ( $P = 6$   
107  $\times 10^{-3}$ ,  $4 \times 10^{-4}$ ,  $9 \times 10^{-5}$ ,  $8 \times 10^{-9}$  and  $4 \times 10^{-4}$ , respectively  $< 0.01$  by Student's *t*-test)  
108 (Fig. 2B *Inset*). The *gli521* (P476R) mutant featured by enhanced binding showed  
109 smaller force than the wild-type strain, suggesting that the legs keep binding, not in  
110 repetitive cycle of catch and release, in the stalled state.

111

112 **Genome sequencing of various strains.** To determine the proteins and mutations  
113 associated with the decreases in the stall force, we sequenced the genomes of the strains  
114 by using a next-generation sequencer, MiSeq. The genome of the *gli521* (P476R)

mutant was previously sequenced for a 30,469-bp DNA region encoding four open reading frames (ORFs), *gli123*, *gli349*, *gli521* and *gli42*, however, the other regions have not been sequenced (21). The genome sequencing result of the *gli521* (P476R) mutant was consistent with the previous report for the mutation in *gli521* (21) and also showed additional mutations in the new regions (Table 1). One of the additional mutations caused an amino acid substitution in MvspB, a surface protein (23, 36-39). However, the reduced stall force should be caused by the mutation in *Gli521*, because MvspB accounts for only 1.2% mass of all surface proteins and the antibody against a closely related abundant protein, MvspI did not influence the gliding motility (23, 39). The genomes of m6, m14, m27, m29 and m34 strains have not been sequenced yet, and we identified various mutations in the present study. The cause of the decreased stall force for m27 strain was suggested to be the mutation in *gli521* identified in the present study. All strains had the same single amino acid substitution from serine to isoleucine as 354th residue in MMOB1700, a homolog of ABC transporter permease based on BLAST search. This mutation may be derived from a substitution caused on the clone used for the reported genome sequencing, because the genome was sequenced for an isolate from the wild-type strain (ATCC 43663) being used in the present study (36). Interestingly, MMOB1700 showed other five different mutations in the 10 strains analyzed, suggesting a special mechanism causing high mutation rate in this gene. Next, we sequenced the genomes of nonbinding strains, m12, m13 and m23 which have been reported to have mutations in *gli123*, *gli349* and *gli349*, respectively (12, 15, 16, 35). The genome sequencing showed that the identified mutations were consistent with a previous report (35), although additional mutations were identified in other regions.

**Binding and gliding of various strains.** To clarify the relation between the features and mutation on the genome systematically, we examined the binding activities and the gliding speeds for the wild-type, *gli521* (P476R), m6, m14, m27, m29 and m34 mutants which can glide. The cell suspensions were adjusted to be the same optical density and inserted into a tunnel chamber. After 15 min, we video recorded the cells to count the numbers on a glass for bound-cell ratio and their gliding speed, as previously

146 reported (Fig. 3A) (29, 35, 40). The binding activities and the gliding speeds were  
 147 averaged for 20 independent images and 100 cells, respectively. The binding activity  
 148 and gliding speed of *gli521* (P476R) mutant were consistent with the previous study  
 149 (35). Other strains have not been analyzed by the method used here. The characters  
 150 of binding activities allowed classification of the strains into three types (Fig. 3B left).  
 151 (i) m6 was 44% of that of the wild-type strain. (ii) m14, m27 and m29 were 80%, 92%  
 152 and 73%, respectively. (iii) *gli521* (P476R) and m34 mutants were 159% and 145%,  
 153 respectively. We compared these data to the binding activities which were previously  
 154 estimated from hemadsorption, the adsorption of erythrocytes onto the surface of  
 155 colonies (12). The hemadsorption of m6, m14, m27, m29 and m34 was 24%, 93%,  
 156 113%, 96% and 122%, respectively, consistent with the analyses in the present study,  
 157 except m27. The gliding speed of the wild-type strain was  $3.7 \pm 0.2 \mu\text{m/s}$  and the  
 158 mutants ranged from 80% to 103%, showing that the gliding speed differ less than the  
 159 binding activities (Fig. 3B right). The strains enhanced for binding, the *gli521*  
 160 (P476R) and m34 mutants had the reduced stall forces, suggesting that the stall force is  
 161 not determined simply by binding activity.  
 162 Interestingly, we noticed that the proportions of nongliding bound cells are much higher  
 163 in m6, m14, m27 and m29 strains than that of the wild-type strain. The proportions of  
 164 gliding cells in the cells on glass were 94% for the wild-type strain as previously  
 165 reported (40), but ranged 38% — 84% in m6, m14, m27 and m29 strains (Fig. S1).  
 166 This observation can be explained by assuming that the gliding can be achieved by  
 167 harmonized actions of many molecules and interactions.

168  
 169 **Effect of SOs on stall force.** An *M. mobile* cell glides as a result of integrated  
 170 movements for many legs. However, if the number of working legs is decreased, we  
 171 may detect the pulling force of single unit. Previous studies showed that the number  
 172 of working legs can be decreased by adding free SOs (9, 22, 25, 27, 40, 41). We  
 173 therefore added various concentrations of free sialyllactose (SL), an SO, to gliding *M.*  
 174 *mobile* cells and measured the stall force at 200 and 500 frames/s for the conditions of 0  
 175 — 0.25 and 0.33 and 0.5 mM free SL, respectively. The cells reached plateau by 30 —  
 176 40 s, and the time to reach the stall became longer with the concentration of free SL.

177 The stall force decreased from 113 to 19 pN with the addition up to 0.50 mM free SL  
178 (Fig. 4A and B). These results suggest that the stall force is sum of the pulling force of  
179 many units.

180

181 To detect the pulling force by smaller numbers of unit, we reduced the laser power of  
182 optical tweezers to achieve higher resolution of the trace. In this experiment, we  
183 applied 0.25 mM SL with the reduction of the trap stiffness of optical tweezers from 0.5  
184 —0.7 to 0.1 pN/nm in which the trapped cells could escape from the trap center, and  
185 measured the force under these conditions. The force increments with repeated small  
186 peaks were detected, and the peaks were measured by a peak-finding algorithm and  
187 summarized in Fig. 5A. The distribution of these increments was fitted by the sum of  
188 four Gaussian curves whose peaks positioned at 1.1, 2.0, 3.2 and 4.4 pN (Fig. 5B).  
189 The peaks positioned at twice, three and four times of the value of the first peak,  
190 suggesting that these peaks may reflect single, double, triple and quadruple of the  
191 minimum force increment (42). In the same way, the individual increments were  
192 analyzed for the *gli521* (P476R) mutant and also fitted by the sum of four Gaussian  
193 curves whose peaks positioned at 0.9, 1.8, 2.6 and 3.5 pN (Fig. 5B).

194

195 **Stepwise force increments.** As the force increments were detected under the  
196 conditions of limited leg number, these force increments may be derived from the force  
197 generation by a single leg or minimum force generation unit. Next, we added 0.50  
198 mM SL to limit the number of working legs more with the reduction of the trap stiffness  
199 to 0.06—0.07 pN/nm to detect the minimum force increments more precisely. As very  
200 small ratio of cells remained on the glass surface under this condition, we attached a  
201 bead to the cells by optical tweezers. Fifty one of 63 cells showed displacements.  
202 Eight cells glided creeping displacements with occasional discontinuous increments,  
203 which were mostly stepwise (Fig. 6A) and sometimes small peaks as shown in Fig 5.  
204 Three cells showed continuous stepwise force increments (Fig. 6B). The average value  
205 of force increments from 46 steps or peaks in 11 cell trajectories was  $1.45 \pm 0.44$  pN  
206 (Fig. 6C). These results suggest that the minimum force increment distributed from 1  
207 to 2 pN, which should be the minimum unit force for gliding.

208

## 209 **Discussion**

210 **Mutations influencing gliding.** In the present study, we sequenced the whole  
 211 genomes of *M. mobile* mutants featured by binding ability, gliding motility and colony  
 212 spreading. Based on these results, we propose the proteins responsible or related to  
 213 these features. The m6 strain featured with reduced binding, slower gliding speed and  
 214 weaker stall force has a mutation in FtsH, MvspI and SecY (37-39, 43, 44). The  
 215 substituted amino acid in FtsH is not conserved in other mycoplasmas except  
 216 *Mycoplasma pulmonis*, a closely related species. The MvspI is unlikely related to their  
 217 gliding as described above (23). SecY is essential for protein secretion in bacteria,  
 218 generally (44). The substitution in SecY probably should affect the secretion of  
 219 gliding proteins, resulting in the reduction of binding activity of cells, because the  
 220 substituted amino acid is conserved in many mycoplasmas, including *Mycoplasma*  
 221 *hominis*, *Mycoplasma bovis*, and *M. pulmonis*. The m14 strain featured with reduced  
 222 binding and gliding, has a substitution of amino acid conserved in glucokinase which  
 223 phosphorylates glucose to glucose-6-phosphate at the first step of glycolysis (45).  
 224 Interestingly, the colony of m14 is less dispersed than that of the wild-type strain,  
 225 suggesting that the glucokinase is related to gliding including chemotaxis, because one  
 226 of the colony shape determinants is motility in many bacteria (12). The m27 featured  
 227 with the small proportion of gliding cells has a substitution at the 1461st amino acid of  
 228 total 4727 in the coded Gli521 protein, suggesting that the structure around this position  
 229 has an indispensable role for gliding. The m34 strain featured with the enhanced  
 230 binding has a substitution in the conserved amino acid of  $\beta$  subunit of F-type ATPase  
 231 (46). The membrane potential may be related to binding activity, because the F-type  
 232 ATPase is responsible for the membrane potential in *M. mobile*.

233

## 234 **Cell behavior in stall.**

235 The cells were stalled by the optical tweezers focusing to the bead bound to the back  
 236 end of cell. What events can we expect in the stall? The stall force decreased with  
 237 the addition of free SL (Fig. 4). This observation suggests that the legs repeat catch,  
 238 pull and release with SOs in stall rather than generate static force, because the stall force



239 should increase up to the stall force without SOs if the legs do not detach in stall. In  
 240 our gliding model, we suggest that the leg detaches by the tension caused by the  
 241 continuous cell displacement in gliding (14, 28, 41). The putative detach in the stall  
 242 may suggest that the directed detach occurs in much shorter displacement than expected  
 243 from the leg structure 95 nm in length. This assumption can explain the observation  
 244 that *gli521* (P476R) and m34 mutants showed smaller stall force than the wild-type  
 245 strain, although they have higher ratio of bound cell to glass (Fig. 2 and 3). Probably,  
 246 the higher ratio of bound cell is caused by the smaller force to detach the post stroke  
 247 legs.

248

249 **The unit number of gliding machinery.** The minimum force increment did not  
 250 change significantly with the distance from the laser. As the force increments occurred  
 251 additionally to the previous ones, the gliding unit should generate the same force  
 252 constantly in a rather long distance ranging 0 to 200 nm (Fig. 6).

253 In the present study, we measured the stall force and the minimum force increments of a  
 254 cell, which were about 113 and 1.5 pN, respectively (Fig 2B and 6C). Previously, the  
 255 number of legs in *M. mobile* was estimated to be 450 (16). The number of working  
 256 units was calculated from the stall force and minimum force increments of a cell, 113  
 257 over 1.5 pN is calculated to be about 75-fold, suggesting that 75 minimum units can  
 258 work simultaneously. Assuming that the minimum unit of force corresponds to the  
 259 single molecule of Gli349, one-sixth of Gli349 molecules are suggested to participate in  
 260 the force generation in the stalled state simultaneously (Fig. 1B). The friction  
 261 occurring at the interface between an *M. mobile* cell and water flow in the interlamellar  
 262 of carp gill is calculated to be 34 pN for the maximum, based on Stokes' law (11, 47).  
 263 This number is three folds smaller than the stall force of a cell, suggesting that a cell can  
 264 glide against water flow using the force generated by simultaneous strokes of many  
 265 legs.

266

267 ***M. mobile* gliding is featured with large step and small force.** We compare the step  
 268 size and the force of *M. mobile* gliding to those of conventional motor proteins such as  
 269 myosin, dynein, and kinesin, which perform the stepwise movements along the rail  
 270 proteins driven by the energy of ATP. The step sizes and the force of myosin-II,  
 271 cytoplasmic dynein, kinesin and myosin-V have been reported as 5.3, 8, 8 and 36 nm,  
 272 and 3–5, 7–8, 8 and 2–3 pN, respectively (48-53). Long step and small force of

273 myosin-V should be caused by the lever effect of 26-nm arms (54). The step size of *M.*  
274 *mobile* has been reported as 70 nm, much larger than those of the conventional motor  
275 proteins (22). The minimum unit force calculated here, 1–2 pN, suggests the gear  
276 effect in the gliding machinery. Gli521, the force transmitter forms triskelion with  
277 100-nm arms (24) and Gli349, the leg is shaped like an eighth note in musical notation  
278 with 50-nm flexible string (26, 55), suggesting that these proteins cause the gear effect.

279  
280 **Energy conversion efficiency of *M. mobile* gliding.** The direct energy source of *M.*  
281 *mobile* gliding has been shown as ATP, based on the experiments that permeabilized  
282 cells, “gliding ghost” can be reactivated by ATP (21). The gliding ghost showed  
283 stepwise movement with dwell time dependent on the ATP concentration used,  
284 suggesting that the step is coupled with ATP hydrolysis (22). Based on the minimum  
285 unit force of 1–2 pN and the spring constant of 0.06–0.07 pN/nm, the work done per  
286 step,  $W_{\text{step}}$  was calculated as 8–33 pN nm from the equation  $W_{\text{step}} = 1/2 \times \text{spring}$   
287  $\text{constant} \times \text{displacement}^2$ . Assuming that one ATP molecule is consumed per step,  
288 energy conversion efficiency of *M. mobile* gliding can be calculated around 10–40%  
289 because generally about 80 pN nm free energy is available from a hydrolysis of one ATP  
290 molecule.

291 F-type ATPase has been reported to reach 100% of energy conversion efficiency (56).  
292 The gliding machinery of *M. mobile* has been suggested to be driven by the  $\alpha$ - and  
293  $\beta$ -subunit paralogs of F-type ATPase (18). The force transmission from this motor to  
294 the solid surfaces through several large components including Gli521 and Gli349 may  
295 cause the loss of energy.

## 296 **Materials and methods**

297 **Strains and Cultivation.** *M. mobile* strain 163K (ATCC 43663) as the wild type and its  
298 9 mutants were grown in Aluotto medium at 25°C, as previously described (12, 35, 40,  
300 57).

301  
302 **Surface modifications of *M. mobile* cells and polystyrene beads.** The cultured cells  
303 were washed with PBS/G consisting of 75mM sodium phosphate (pH 7.3), 68 mM NaCl,  
304 and 20 mM glucose, suspended in 1.0 mM Sulfo-NHS-LC-LC-biotin (Thermo Scientific,  
305 Waltham, MA) in PBS/G, and kept for 15 min at room temperature (RT), as previously

described (28, 29, 33, 34, 40). Polystyrene beads 1.0  $\mu\text{m}$  in diameter (Polysciences, Warrington, PA) were coated with avidin (Sigma-Aldrich, St. Louis, MO), as previously described (28).

**Force measurements.** The avidin-coated beads were attached to biotinylated cells in two different ways, according to the concentrations of free SL used in experiments. In force measurements under 0–0.13 mM SL conditions, the biotinylated cells were inserted into a tunnel chamber which was precoated with 10% horse serum (20, 27, 29). Avidin-coated beads were sonicated and inserted into the tunnel chamber with various concentrations of free SL in PBS/G and bound to the cell (32). In force measurements under 0.25–0.50 mM SL conditions, avidin-coated beads were sonicated and mixed with biotinylated cells in a microtube, and kept for 10–30 min at RT. Then, the mixture was inserted into a tunnel chamber and kept 15 min at RT. The chamber was washed with PBS/G and the PBS/G was replaced by various concentrations of free SL in PBS/G. Both ends of the tunnel were sealed with nail polish. The bead movements were recorded at 200 or 500 frames/s and analyzed by the displacement up to 250 nm from the trap center, the linear range of the laser trap, by using ImageJ 1.43u (<http://rsb.info.nih.gov/ij/>) and IGOR Pro 6.33J (WaveMetrics, Portland, OR) (22, 28, 32, 58).

**Genome sequencing of various strains.** All strains were plated and isolated as previously described (19). The genomic DNAs were isolated by using QIAGEN DNeasy Blood & Tissue kit (QIAGEN, Hilden, Germany). The isolated genomic DNA were sequenced by MiSeq (Illumina Inc., San Diego, CA) and mapped by CLC Genomics Workbench 8 (QIAGEN, Hilden, Germany).

**Characterization of binding and gliding of various strains.** All strains were cultured to reach an optical densities at 600 nm of 0.08. They were suspended and inserted into a tunnel chamber (27, 29). The cell behaviors were recorded and analyzed as previously reported (27, 35).

## ACKNOWLEDGMENTS.

This work was supported by a Grant-in-Aid for Scientific Research on the Innovative Area "Harmonized Supramolecular Motility Machinery and Its Diversity" (MEXT KAKENHI Grant Number 24117002), and by a Grant-in-Aid for Scientific Research

341 (B) (MEXT KAKENHI Grant Numbers 24390107) to MM.

342

# 343 **References**

- 344 1. Razin S, Yogev D, & Naot Y (1998) Molecular biology and pathogenicity of  
345 mycoplasmas. *Microbiol Mol Biol Rev* 62(4):1094-1156.
- 346 2. Razin S & Hayflick L (2010) Highlights of mycoplasma research--an historical  
347 perspective. *Biologicals* 38(2):183-190.
- 348 3. Miyata M (2008) Centipede and inchworm models to explain *Mycoplasma* gliding.  
349 *Trends Microbiol* 16(1):6-12.
- 350 4. Miyata M (2010) Unique centipede mechanism of *Mycoplasma* gliding. *Annu Rev*  
351 *Microbiol* 64:519-537.
- 352 5. Miyata M & Hamaguchi T (2016) Prospects for the gliding mechanism of  
353 *Mycoplasma mobile*. *Curr Opin Microbiol* 29:15-21.
- 354 6. Nakane D, Kenri T, Matsuo L, & Miyata M (2015) Systematic structural analyses  
355 of attachment organelle in *Mycoplasma pneumoniae*. *PLoS Pathog*  
356 11(12):e1005299.
- 357 7. Miyata M & Hamaguchi T (2016) Integrated information and prospects for gliding  
358 mechanism of the pathogenic bacterium *Mycoplasma pneumoniae*. *Front Microbiol*  
359 7:960.
- 360 8. Kawamoto A, *et al.* (2016) Periodicity in attachment organelle revealed by electron  
361 cryotomography suggests conformational changes in gliding mechanism of  
362 *Mycoplasma pneumoniae*. *MBio* 7(2):e00243-00216.
- 363 9. Morio H, Kasai T, & Miyata M (2015) Gliding direction of *Mycoplasma mobile*. *J*  
364 *Bacteriol* 198(2):283-290.
- 365 10. Lee W, *et al.* (2015) Three-dimensional superlocalization imaging of gliding  
366 *Mycoplasma mobile* by extraordinary light transmission through arrayed nanoholes.  
367 *ACS Nano* 9(11):10896-10908.
- 368 11. Miyata M, Ryu WS, & Berg HC (2002) Force and velocity of *Mycoplasma mobile*  
369 gliding. *J Bacteriol* 184:1827-1831.
- 370 12. Miyata M, *et al.* (2000) Gliding mutants of *Mycoplasma mobile*: relationships  
371 between motility and cell morphology, cell adhesion and microcolony formation.  
372 *Microbiology* 146 ( Pt 6):1311-1320.
- 373 13. Rosengarten R & Kirchhoff H (1987) Gliding motility of *Mycoplasma* sp. nov.  
374 strain 163K. *J Bacteriol* 169:1891-1898.
- 375 14. Chen J, Neu J, Miyata M, & Oster G (2009) Motor-substrate interactions in  
376 mycoplasma motility explains non-Arrhenius temperature dependence. *Biophys J*

- 377 97(11):2930-2938.
- 378 15. Uenoyama A, Kusumoto A, & Miyata M (2004) Identification of a 349-kilodalton  
379 protein (Gli349) responsible for cytoadherence and glass binding during gliding of  
380 *Mycoplasma mobile*. *J Bacteriol* 186:1537-1545.
- 381 16. Uenoyama A & Miyata M (2005) Identification of a 123-kilodalton protein  
382 (Gli123) involved in machinery for gliding motility of *Mycoplasma mobile*. *J*  
383 *Bacteriol* 187:5578-5584.
- 384 17. Seto S, Uenoyama A, & Miyata M (2005) Identification of a 521-kilodalton protein  
385 (Gli521) involved in force generation or force transmission for *Mycoplasma mobile*  
386 gliding. *J Bacteriol* 187:3502-3510.
- 387 18. Nakane D & Miyata M (2007) Cytoskeletal “Jellyfish” structure of *Mycoplasma*  
388 *mobile*. *Proc. Natl. Acad. Sci. USA* 104:19518-19523.
- 389 19. Tulum I, Yabe M, Uenoyama A, & Miyata M (2014) Localization of P42 and  
390 F<sub>1</sub>-ATPase alpha-subunit homolog of the gliding machinery in *Mycoplasma mobile*  
391 revealed by newly developed gene manipulation and fluorescent protein tagging. *J*  
392 *Bacteriol* 196(10):1815-1824.
- 393 20. Jaffe JD, Miyata M, & Berg HC (2004) Energetics of gliding motility in  
394 *Mycoplasma mobile*. *J Bacteriol* 186(13):4254-4261.
- 395 21. Uenoyama A & Miyata M (2005) Gliding ghosts of *Mycoplasma mobile*. *Proc Natl*  
396 *Acad Sci USA* 102(36):12754-12758.
- 397 22. Kinoshita Y, *et al.* (2014) Unitary step of gliding machinery in *Mycoplasma mobile*.  
398 *Proc. Natl. Acad. Sci. USA* 111(23):8601-8606.
- 399 23. Kusumoto A, Seto S, Jaffe JD, & Miyata M (2004) Cell surface differentiation of  
400 *Mycoplasma mobile* visualized by surface protein localization. *Microbiology* 150(Pt  
401 12):4001-4008.
- 402 24. Nonaka T, Adan-Kubo J, & Miyata M (2010) Triskelion structure of the Gli521  
403 protein, involved in the gliding mechanism of *Mycoplasma mobile*. *J Bacteriol*  
404 192:636-642.
- 405 25. Nagai R & Miyata M (2006) Gliding motility of *Mycoplasma mobile* can occur by  
406 repeated binding to *N*-acetylneuraminylactose (sialyllactose) fixed on solid  
407 surfaces. *J Bacteriol* 188:6469-6475.
- 408 26. Adan-Kubo J, Uenoyama A, Arata T, & Miyata M (2006) Morphology of isolated  
409 Gli349, a leg protein responsible for *Mycoplasma mobile* gliding via glass binding,  
410 revealed by rotary shadowing electron microscopy. *J Bacteriol* 188(8):2821-2828.
- 411 27. Kasai T, *et al.* (2013) Role of binding in *Mycoplasma mobile* and *Mycoplasma*  
412 *pneumoniae* gliding analyzed through inhibition by synthesized sialylated

- 413 compounds. *J Bacteriol* 195:429-435.
- 414 28. Tanaka A, Nakane D, Mizutani M, Nishizaka T, & Miyata M (2016) Directed  
415 binding of gliding bacterium, *Mycoplasma mobile*, shown by detachment force and  
416 bond lifetime. *MBio* 7(3):e00455-00416.
- 417 29. Nakane D & Miyata M (2012) *Mycoplasma mobile* cells elongated by detergent and  
418 their pivoting movements in gliding. *J Bacteriol* 194:122-130.
- 419 30. Ashkin A, Dziedzic JM, Bjorkholm JE, & Chu S (1986) Observation of a  
420 single-beam gradient force optical trap for dielectric particles. *Opt Lett* 11(5):288.
- 421 31. Nishizaka T, Miyata H, Yoshikawa H, Ishiwata S, & Kinoshita K, Jr. (1995)  
422 Unbinding force of a single motor molecule of muscle measured using optical  
423 tweezers. *Nature* 377:251-254.
- 424 32. Mizutani M & Miyata M (2017) Force measurement on *Mycoplasma mobile*  
425 gliding using optical tweezers. *Bio-protocol* 7(3): e2127.
- 426 33. Hiratsuka Y, Miyata M, & Uyeda TQ (2005) Living microtransporter by  
427 uni-directional gliding of *Mycoplasma* along microtracks. *Biochem Biophys Res*  
428 *Commun* 331(1):318-324.
- 429 34. Hiratsuka Y, Miyata M, Tada T, & Uyeda TQ (2006) A microrotary motor powered  
430 by bacteria. *Proc Natl Acad Sci U S A* 103(37):13618-13623.
- 431 35. Uenoyama A, Seto S, Nakane D, & Miyata M (2009) Regions on Gli349 and  
432 Gli521 protein molecules directly involved in movements of *Mycoplasma mobile*  
433 gliding machinery, suggested by use of inhibitory antibodies and mutants. *J*  
434 *Bacteriol* 191(6):1982-1985.
- 435 36. Jaffe JD, *et al.* (2004) The complete genome and proteome of *Mycoplasma mobile*.  
436 *Genome Res* 14:1447-1461.
- 437 37. Adan-Kubo J, Yoshii SH, Kono H, & Miyata M (2012) Molecular structure of  
438 isolated MvspI, a variable surface protein of the fish pathogen *Mycoplasma mobile*.  
439 *J Bacteriol* 194(12):3050-3057.
- 440 38. Wu HN, Kawaguchi C, Nakane D, & Miyata M (2012) "Mycoplasmal antigen  
441 modulation," a novel surface variation suggested for a lipoprotein specifically  
442 localized on *Mycoplasma mobile*. *Curr Microbiol* 64(5):433-440.
- 443 39. Wu HN & Miyata M (2012) Whole surface image of *Mycoplasma mobile*,  
444 suggested by protein identification and immunofluorescence microscopy. *J*  
445 *Bacteriol* 194(21):5848-5855.
- 446 40. Kasai T, Hamaguchi T, & Miyata M (2015) Gliding motility of *Mycoplasma mobile*  
447 on uniform oligosaccharides. *J Bacteriol* 197(18):2952-2957.
- 448 41. Kasai T & Miyata M (2013) Analyzing inhibitory effects of reagents on



- 449 *Mycoplasma* gliding and adhesion. *Bio-protocol* 3(14).
- 450 42. Leidel C, Longoria RA, Gutierrez FM, & Shubeita GT (2012) Measuring molecular  
451 motor forces in vivo: implications for tug-of-war models of bidirectional transport.  
452 *Biophys J* 103(3):492-500.
- 453 43. Ito K & Akiyama Y (2005) Cellular functions, mechanism of action, and regulation  
454 of FtsH protease. *Annu Rev Microbiol* 59:211-231.
- 455 44. Mori H & Ito K (2006) Different modes of SecY-SecA interactions revealed by  
456 site-directed in vivo photo-cross-linking. *Proc Natl Acad Sci U S A*  
457 103(44):16159-16164.
- 458 45. Gaurivaud P, *et al.* (2016) *Mycoplasma agalactiae* secretion of beta-(1-->6)-glucan,  
459 a rare polysaccharide in prokaryotes, is governed by high-frequency phase variation.  
460 *Appl Environ Microbiol* 82(11):3370-3383.
- 461 46. Beven L, *et al.* (2012) Specific evolution of F1-like ATPases in mycoplasmas. *PLoS*  
462 *One* 7(6):e38793.
- 463 47. Lauder GV (1984) Pressure and water flow patterns in the respiratory tract of the  
464 bass (*Micropterus salmoides*). *Journal of Experimental Biology* 113:151-164.
- 465 48. Schnitzer MJ & Block SM (1997) Kinesin hydrolyses one ATP per 8-nm step.  
466 *Nature* 388(6640):386-390.
- 467 49. Kojima H, Muto E, Higuchi H, & Yanagida T (1997) Mechanics of single kinesin  
468 molecules measured by optical trapping nanometry. *Biophys J* 73(4):2012-2022.
- 469 50. Takagi Y, Homsher EE, Goldman YE, & Shuman H (2006) Force generation in  
470 single conventional actomyosin complexes under high dynamic load. *Biophys J*  
471 90(4):1295-1307.
- 472 51. Fujita K, Iwaki M, Iwane AH, Marcucci L, & Yanagida T (2012) Switching of  
473 myosin-V motion between the lever-arm swing and brownian search-and-catch. *Nat*  
474 *Commun* 3:956.
- 475 52. Park PJ & Lee KJ (2013) A modified active Brownian dynamics model using  
476 asymmetric energy conversion and its application to the molecular motor system. *J*  
477 *Biol Phys* 39(3):439-452.
- 478 53. Gennerich A, Carter AP, Reck-Peterson SL, & Vale RD (2007) Force-induced  
479 bidirectional stepping of cytoplasmic dynein. *Cell* 131(5):952-965.
- 480 54. Vilfan A (2005) Elastic lever-arm model for myosin V. *Biophys J* 88(6):3792-3805.
- 481 55. Metsugi S, *et al.* (2005) Sequence analysis of the gliding protein Gli349 in  
482 *Mycoplasma mobile*. *Biophysics (Nagoya-shi)* 1:33-43.
- 483 56. Kinosita K, Jr., Yasuda R, Noji H, & Adachi K (2000) A rotary molecular motor  
484 that can work at near 100% efficiency. *Philos Trans R Soc Lond B Biol Sci*

485 355(1396):473-489.

486 57. Aluotto BB, Wittler RG, Williams CO, & Faber JE (1970) Standardized  
487 bacteriologic techniques for the characterization of *Mycoplasma* species. *Int. J. Syst.*  
488 *Bacteriol.* 20:35-58.

489 58. Kinoshita Y, Uchida N, Nakane D, & Nishizaka T (2016) Direct observation of  
490 rotation and steps of the archaellum in the swimming halophilic archaeon  
491 *Halobacterium salinarum*. *Nat Microbiol* 1(11):16148.

492

### 493 **Figure legends**

494

495 **Fig. 1.** Schematic illustration of gliding machinery. (A) Magnified illustration of unit.  
496 The single unit consists of internal structure (upper blue) and three huge proteins,  
497 Gli123 (purple), Gli349 (red) and Gli521 (green) on the cell surface. The force  
498 generated by the internal structure based on ATP hydrolysis transmits through Gli521  
499 and pulls Gli349 repeatedly. Gli349 catches and pulls SOs on the solid surface, and  
500 the unit force was estimated around 1.5 piconewton (pN) in the present study (see Fig.  
501 6). (B) About 75 legs (red) sticking out from the cell work simultaneously. The cell  
502 glides in the direction of yellow arrow. Only bound legs are illustrated.

503

504 **Fig. 2.** Stall force of various strains. (A) Left: Illustration and micrograph of  
505 measurement by using optical tweezers. The polystyrene bead (circle) 1  $\mu\text{m}$  in  
506 diameter bound to the cell was trapped by a focused laser beam (yellow hourglass) and  
507 glides to the direction of white arrow. Black and pink crosses indicate a focal point of  
508 laser and a bead center, respectively. Right: Optical micrographs of trapped cell. The  
509 cell with bead (large black ring with white center) was trapped at 0 s and stalled at 80 s.  
510 (B) Representative traces. The line colors correspond to the bars in the inset. Inset:  
511 Averages were normalized by the WT value, and presented with standard deviations  
512 (SD) ( $n = 50, 42, 26, 31$  and  $35$ ). \*\*,  $P < 0.01$  (The difference from WT was supported  
513 by Student's  $t$ -test).

514

515 **Fig. 3.** Binding and gliding properties of various strains. (A) The cell trajectories  
516 were presented as a stack for 5 s, changing its color from red to blue. (B) Averages of



517 binding activity (right) and gliding speed (left) were normalized by the WT value and  
518 presented with SD.

519

520 **Fig. 4.** Efficiency of SO on stall force. (A) Representative traces in various  
521 concentrations of SL. (B) Concentration dependency on SL. Averages were plotted  
522 with SD ( $n = 50, 13, 23, 16, 16$  and  $11$  for  $0, 0.05, 0.13, 0.25, 0.33$  and  $0.50$  mM,  
523 respectively).

524

525 **Fig. 5.** Detection of force increments under low load and  $0.25$  mM SL. (A)  
526 Representative traces of force transition in WT and *gli521* (P476R) mutant shown in  
527 upper and lower panels, respectively. Green and cyan triangles in each panel indicate  
528 small peak positions taken by a peak-finding algorithm. (B) Distributions of peak  
529 values detected by the peak-finding algorithm were fitted by the sum of four Gaussian  
530 curves. The first, second, third and fourth tops of Gaussian curves are  $1.1, 2.0, 3.2$  and  
531  $4.4$  pN in WT, and  $1.0, 1.8, 2.6$  and  $3.5$  pN in *gli521* (P476R) mutant, respectively ( $n =$   
532  $976$  and  $1067$ ).

533

534 **Fig. 6.** Detection of force increments under low load and  $0.50$  mM SL. (A) Two  
535 representative time courses of force generation. The trajectories in dashed rectangular  
536 areas are magnified as insets and marked green and blue lines for increments and dwell  
537 times. (B) Representative time course of continuous stepwise trajectory. The  
538 histogram of PDF analysis for indicated steps was shown in right inset. (C) The  
539 histogram of force increments for 46 steps or peaks. The averaged value was indicated  
540 by a black triangle.

541

542 **Fig. S1.** Distributions of gliding speed of various strains in  $10$  s. Experimental data  
543 were fitted by the sum of two Gaussian curves colored in blue.

544

545 **Movie S1.** Stall force of gliding cell carrying a bead measured by optical tweezers.

546 **Movie S2.** Stepwise movement of gliding cell carrying a bead detected with weak  
547 trap.

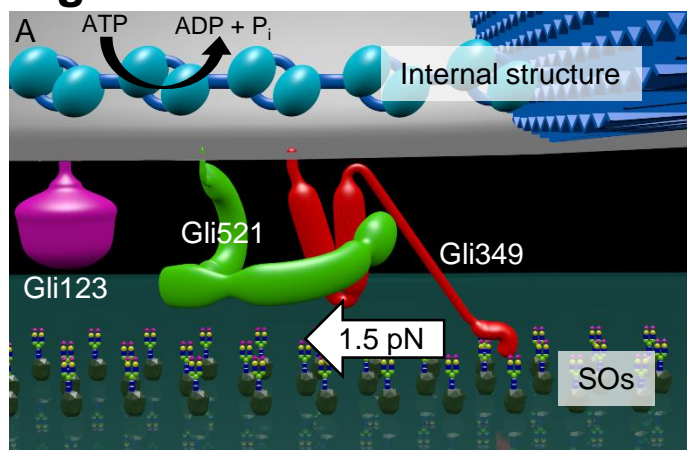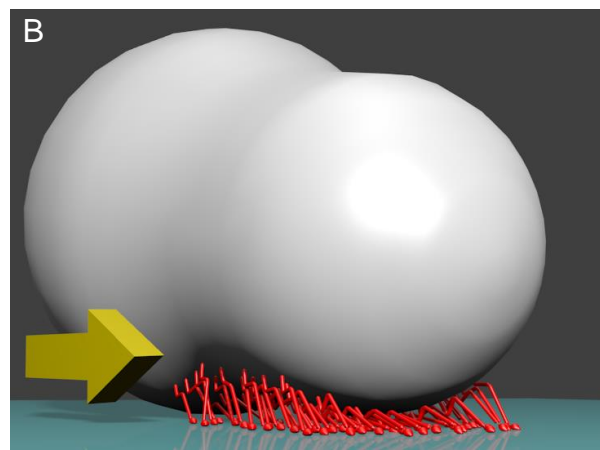

**Fig. 2.**

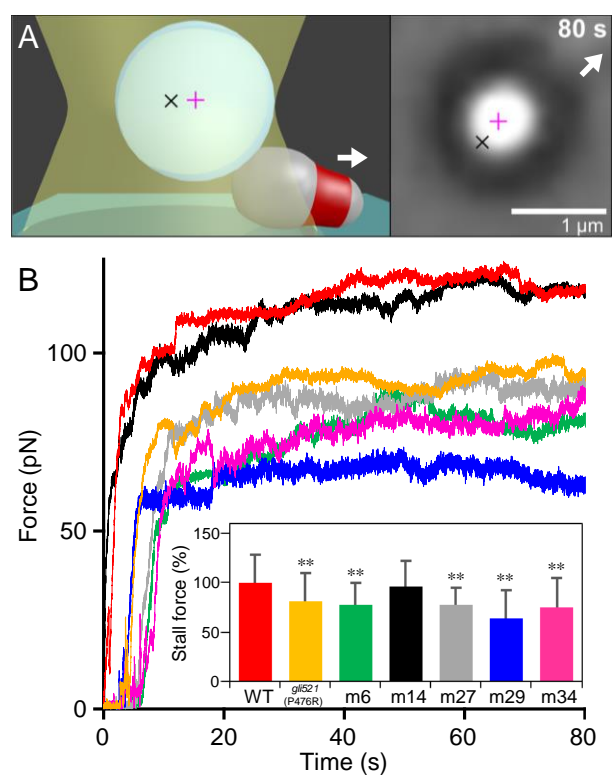

A

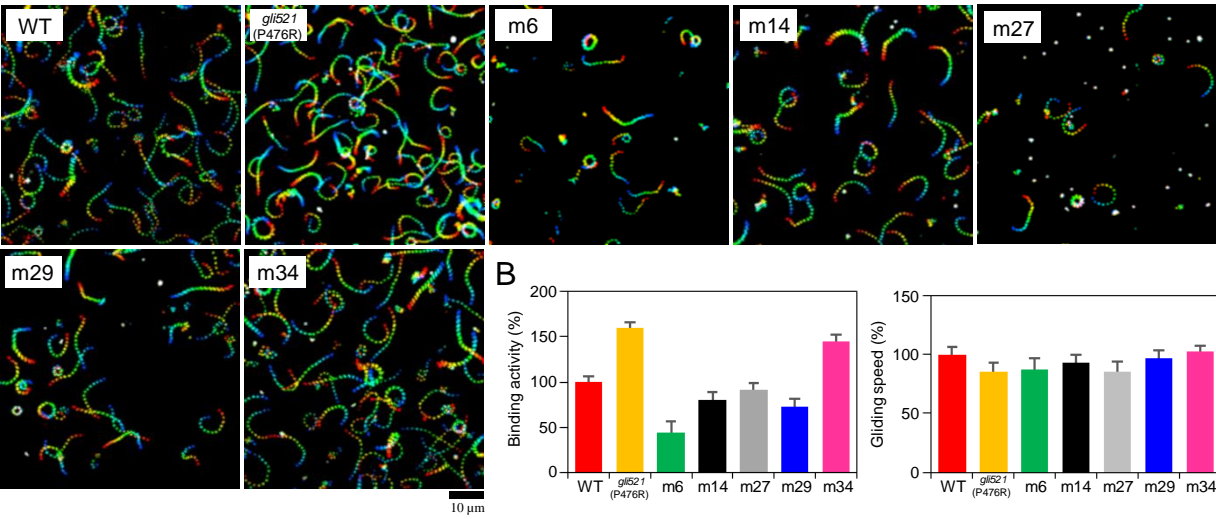

B

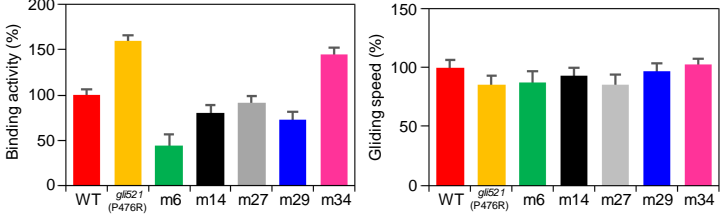

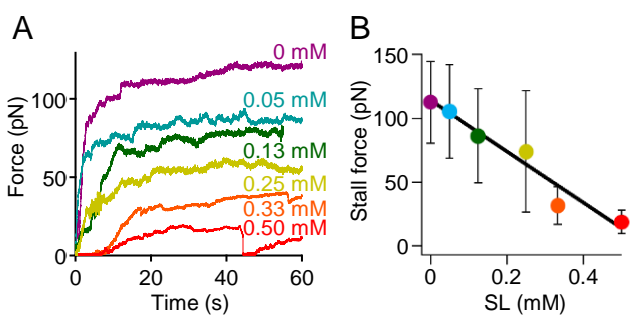

**Fig. 5.**

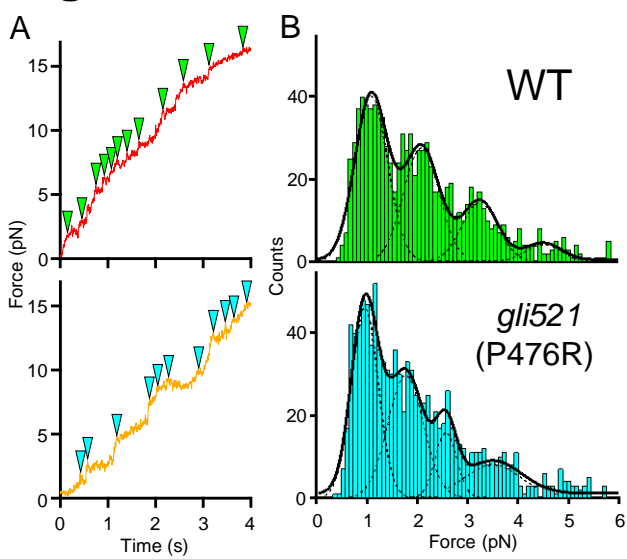

**Fig. 6.**

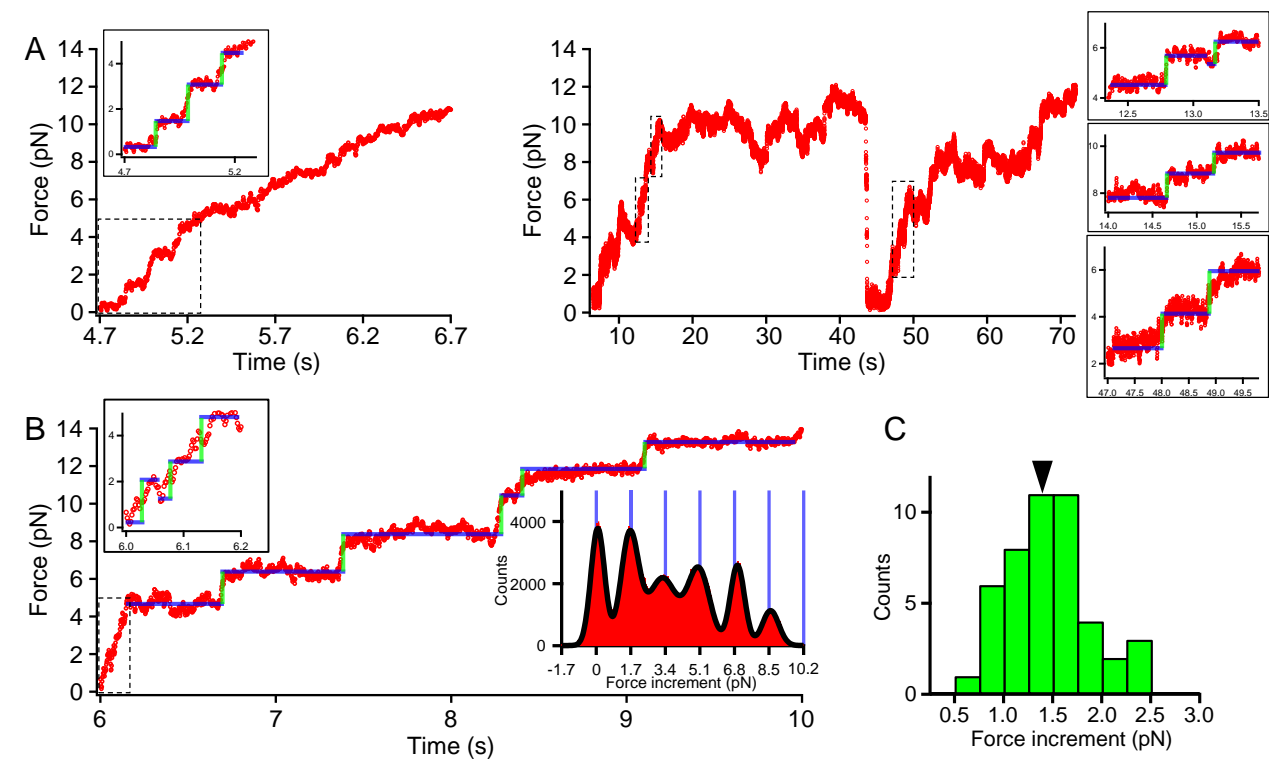

**Fig. S1.**

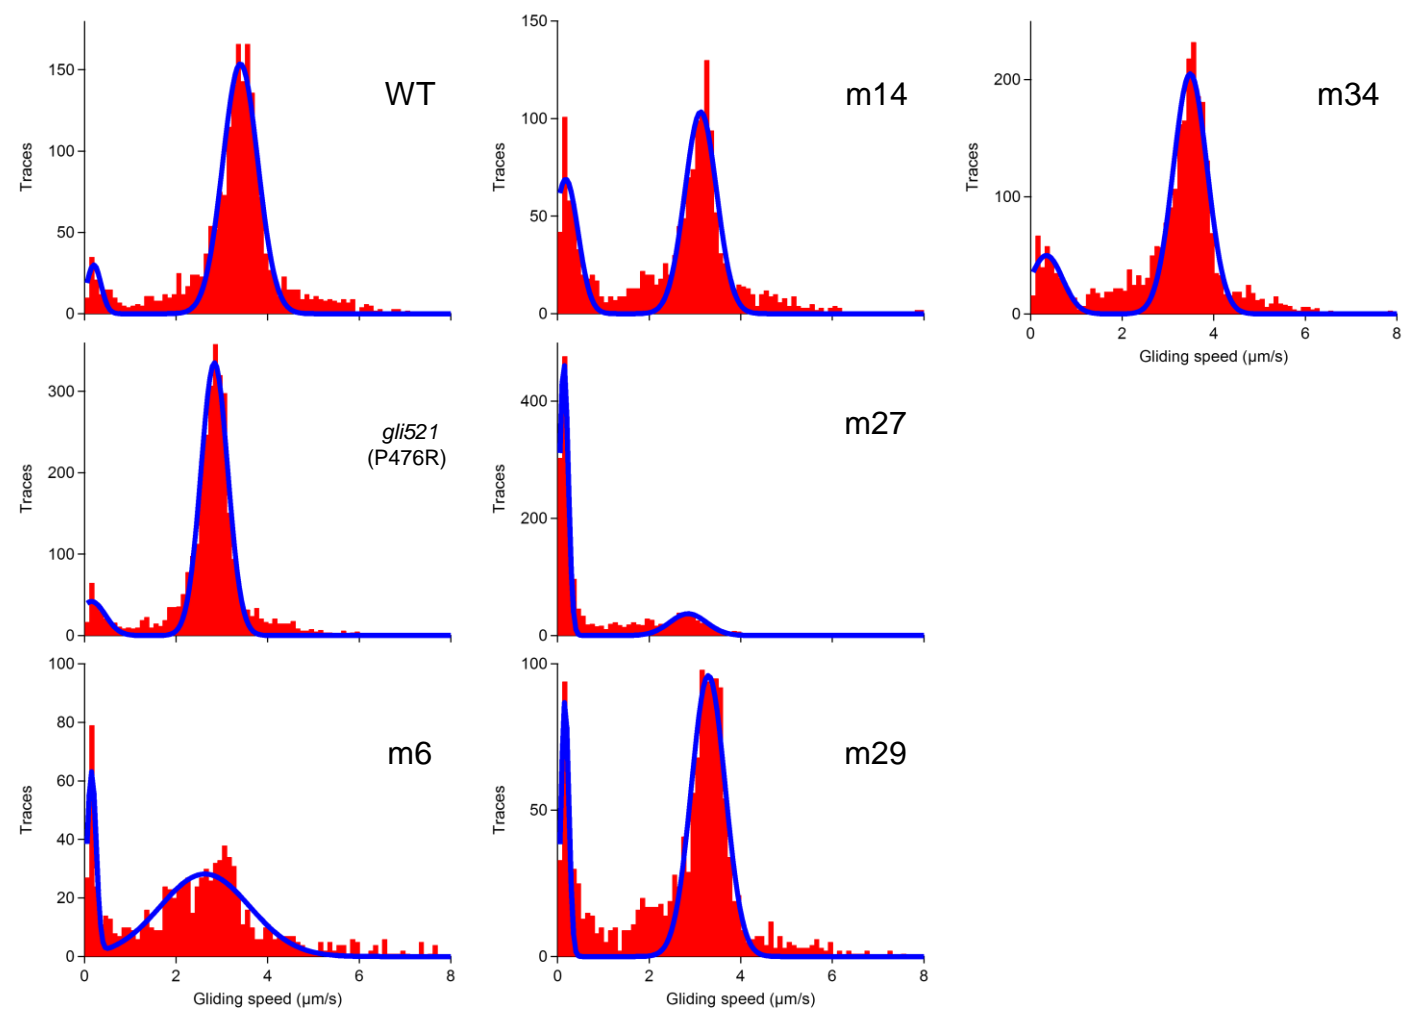



**TABLE 1** Whole genome sequence of various strains

| Strain                   | Nucleotide change <sup>a</sup> | Amino acid change <sup>b</sup> | Previously reported | Mutation type           | ORF                  | Annotation <sup>c</sup>                                      |
|--------------------------|--------------------------------|--------------------------------|---------------------|-------------------------|----------------------|--------------------------------------------------------------|
| WT                       | C232735A                       | S354I                          |                     | missense                | MMOB1700             | Hypothetical                                                 |
| <i>gli521</i><br>(P476R) | C149908G                       | P476R                          | P476R               | missense                | MMOB1040             | Gli521                                                       |
|                          | C232735A                       | S354I                          |                     | missense                | MMOB1700             | Hypothetical                                                 |
|                          | 399903T399904                  | M8—36*                         |                     | frame shift             | MMOB3220             | MvspB                                                        |
| m6                       | C232735A                       | S354I                          |                     | missense                | MMOB1700             | Hypothetical                                                 |
|                          | G308962A                       | G350R                          |                     | missense                | MMOB2540             | SecY preprotein translocase subunit                          |
|                          | C423006-<br>G676032C           | E225—230*<br>P191R             |                     | frame shift<br>missense | MMOB3340<br>MMOB5400 | MvspI<br>FtsH                                                |
|                          | C136968T                       | Q523*                          | Q523*               | nonsense                | MMOB1020             | Gli123                                                       |
| m12                      | T214208-<br>C232735A           | F672—695*<br>S354I             |                     | frame shift<br>missense | MMOB1570<br>MMOB1700 | Oligopeptide ABC transporter binding protein<br>Hypothetical |
|                          | A232903T                       | I298N                          |                     | missense                | MMOB1700             | Hypothetical                                                 |
|                          | C424498A                       | H195N                          |                     | missense                | MMOB3350             | PolC truncated DNA polymerase III                            |
|                          | C142646T                       | Q1257*                         | Q1257*              | nonsense                | MMOB1030             | Gli349                                                       |
| m13                      | C232735A                       | S354I                          |                     | missense                | MMOB1700             | Hypothetical                                                 |
|                          | C232735A                       | S354I                          |                     | missense                | MMOB1700             | Hypothetical                                                 |
|                          | C272657A                       | P156Q                          |                     | missense                | MMOB2030             | Glucokinase                                                  |
| m23                      | C147186T                       | S2770L                         | S2770L              | missense                | MMOB1030             | Gli349                                                       |
|                          | T214208-<br>C232735A           | F672—695*<br>S354I             |                     | frame shift<br>missense | MMOB1570<br>MMOB1700 | Oligopeptide ABC transporter binding protein<br>Hypothetical |
|                          | A233098C                       | I233S                          |                     | missense                | MMOB1700             | Hypothetical                                                 |
|                          | A345995T                       | N18Y                           |                     | missense                | MMOB2830             | HsdR Type I restriction enzyme $\gamma$ protein              |
|                          | A73556G                        | L101L                          |                     | silent                  | MMOB0550             | Frr ribosome recycling factor                                |
|                          | C152863T                       | P1461L                         |                     | missense                | MMOB1040             | Gli521                                                       |
| m27                      | C232735A                       | S354I                          |                     | missense                | MMOB1700             | Hypothetical                                                 |
|                          | C232735A                       | S354I                          |                     | missense                | MMOB1700             | Hypothetical                                                 |
|                          | A587414T                       | K29N                           |                     | missense                | MMOB4660             | TruB tRNA pseudouridine synthase B                           |
|                          | C654504T                       | W82*                           |                     | nonsense                | MMOB5190             | Hypothetical                                                 |
| m29                      | A754250-<br>C232735A           | I126*<br>S354I                 |                     | frame shift<br>missense | MMOB6120<br>MMOB1700 | Hypothetical<br>Hypothetical                                 |
|                          | A232753G                       | I348T                          |                     | missense                | MMOB1700             | Hypothetical                                                 |
|                          | T365326A                       | D304V                          |                     | missense                | MMOB2960             | AtpD F <sub>0</sub> F <sub>1</sub> ATPase beta subunit       |

<sup>a</sup> Numbering is as in the sequence under accession number NC\_006908.<sup>b</sup> Asterisks indicate stop codons.<sup>c</sup> Annotations are based on Molligen 3.0.
